# Supplementary material for: A road to environmentally friendly materials chemistry: low-temperature synthesis of nanosized K0.5Na0.5NbO3 powders through peroxide intermediates in water
Source: Royal Society of Chemistry journal article supplement (doi:10.1039/c0gc00750a), 2011-01-01
Supplement: c0gc00750a.pdf [file c0gc00750a.pdf]

## Supporting Information

# A Road to Environmentally Friendly Materials Chemistry: Low-Temperature Synthesis of Nanosized $K_{0.5}Na_{0.5}NbO_3$ Powders Through Peroxide Intermediates in Water

**Gaj Stavber,\* Barbara Malič, and Marija Kosec**

Jožef Stefan Institute, Jamova 39, 1000 Ljubljana, Slovenia.

\* Corresponding Author: [gaj.stavber@ijs.si](mailto:gaj.stavber@ijs.si); [gaj.stavber@gmail.com](mailto:gaj.stavber@gmail.com)

### Contents:

|     |                                                                             |   |
|-----|-----------------------------------------------------------------------------|---|
| 1.) | Synthetic charts of KNN nanopowders prepared from pure aqueous solutions... | 2 |
| 2.) | IR spectra of Nb(V)-peroxo-based precursors.....                            | 4 |
| 3.) | IR spectrum of annealed final powders.....                                  | 8 |
| 4.) | UV-Vis spectra of Nb(V)-peroxo-based precursors.....                        | 9 |

## 1.) Synthetic Charts of KNN nanopowders prepared from pure aqueous solutions

Fig. 1 Synthesis of KNN powder from Nb(V)-peroxo-citrate aqueous precursor solution

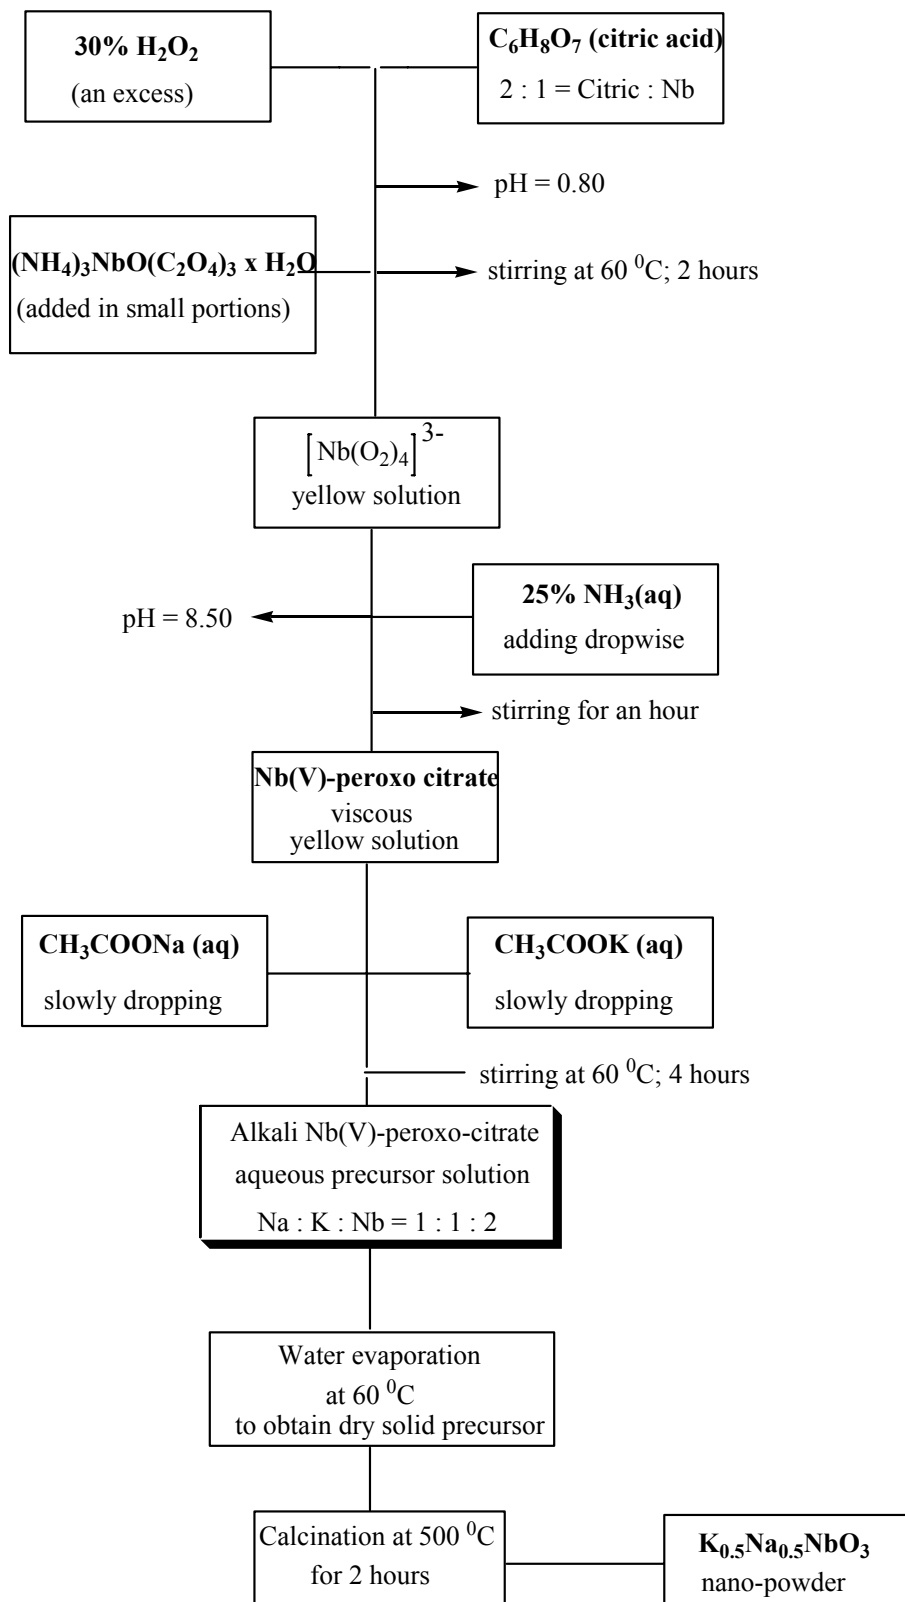

**Fig. 2** Synthesis of KNN powder from Nb(V)-peroxo-glycine aqueous precursor solution

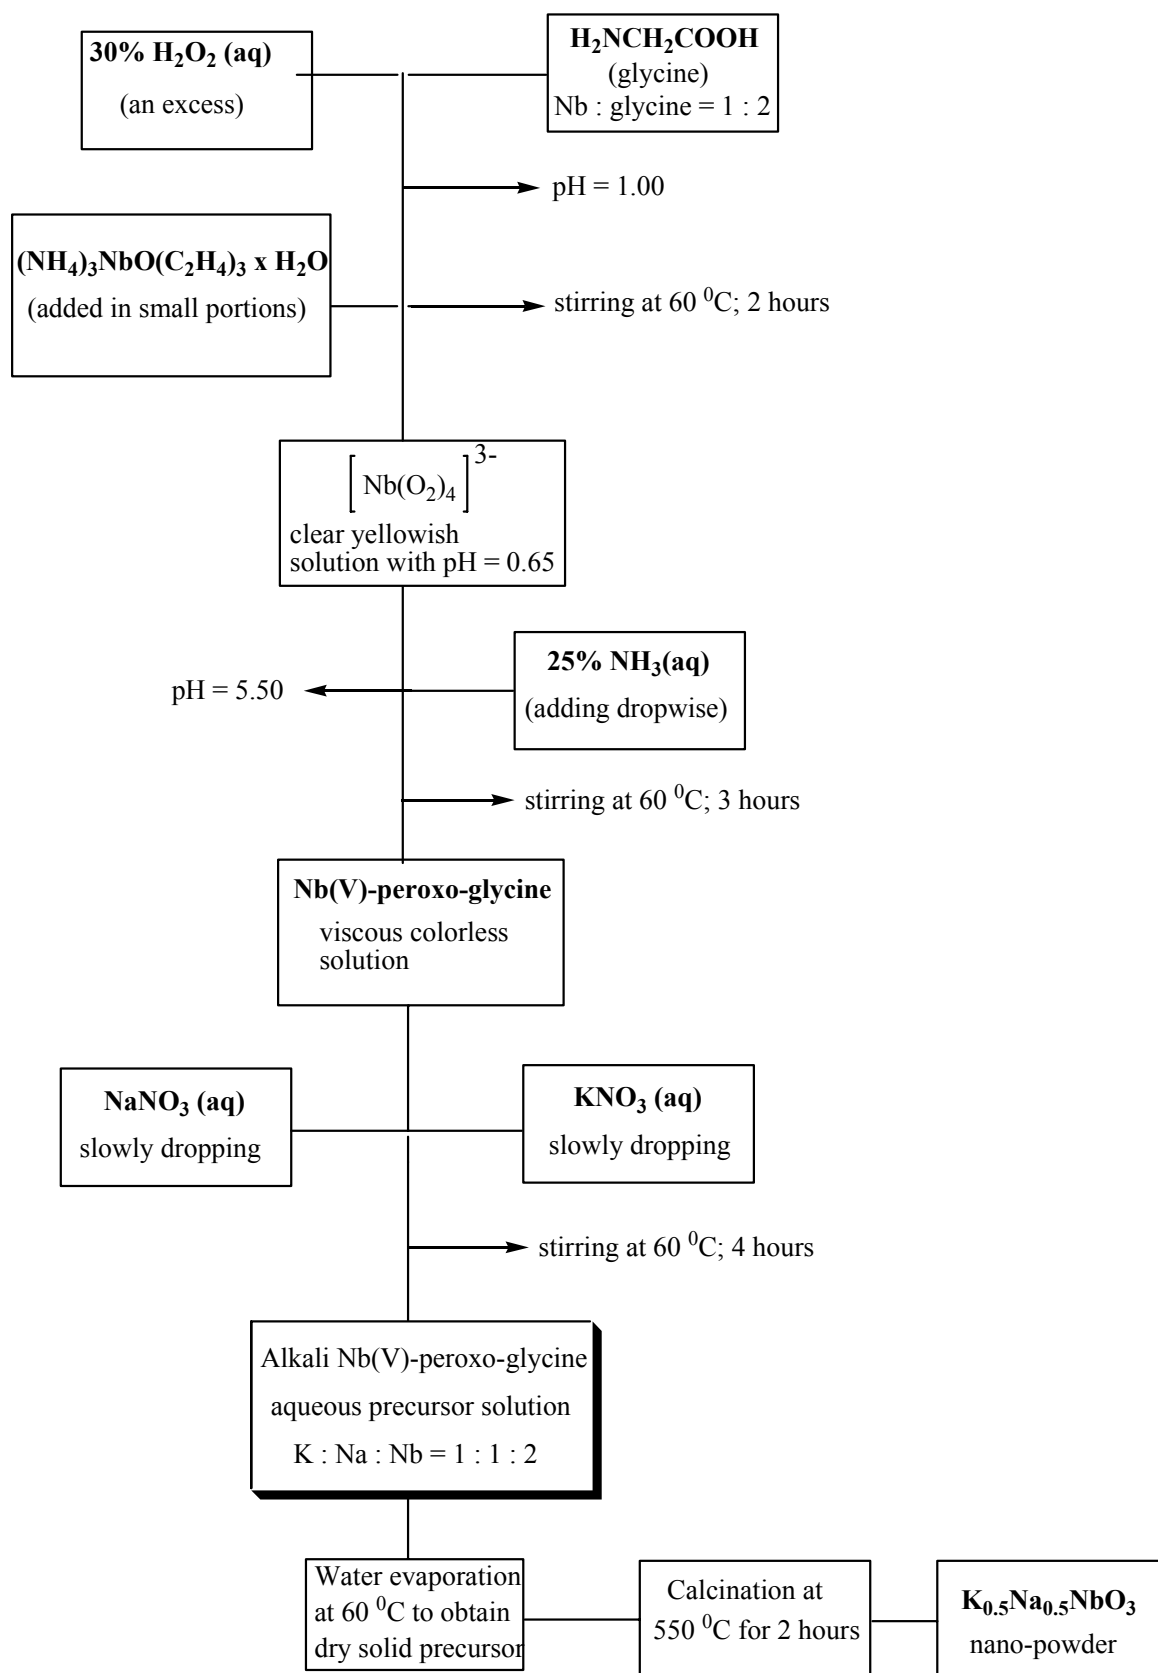

## 2.) IR spectra of Nb(V)-peroxo-based precursors

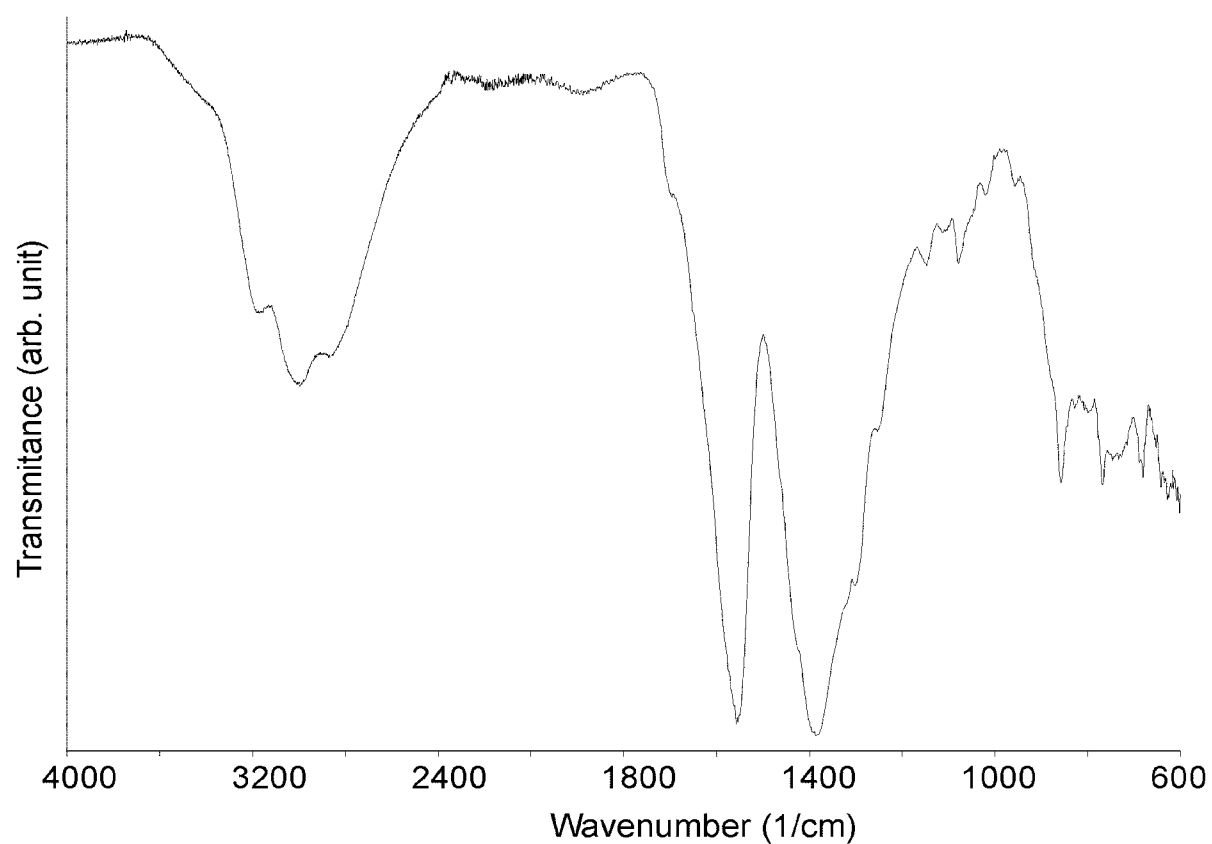

Fig. 3 FT-IR spectrum of Nb(V)-peroxo-citrate precursor prepared from synthetic protocol presented in Fig. 1.

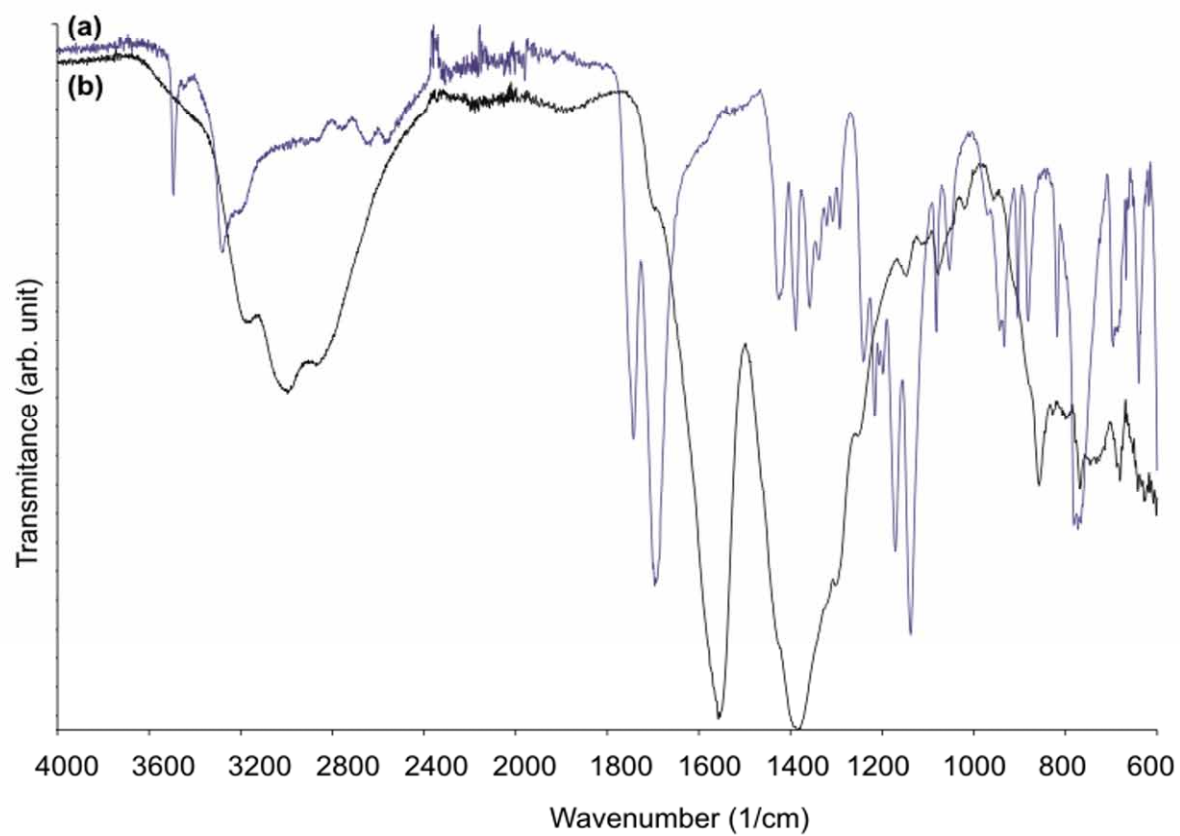

Fig. 4 Comparison of FT-IR spectra of (a) free citric acid (blue profile) with (b) Nb(V)-peroxo-citrate complex (black profile).

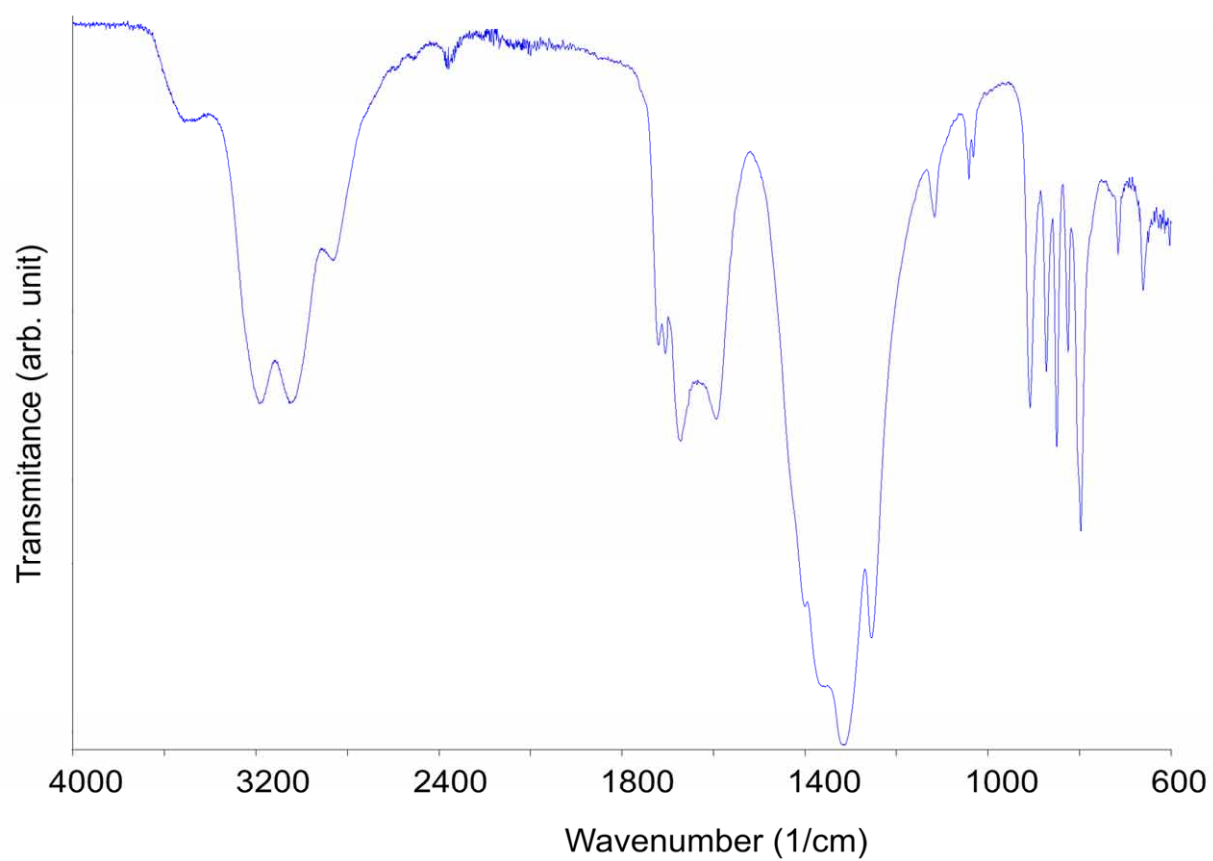

Fig. 5 FT-IR spectrum of Nb(V)-peroxo-glycine precursor prepared from synthetic protocol presented in Fig. 2.

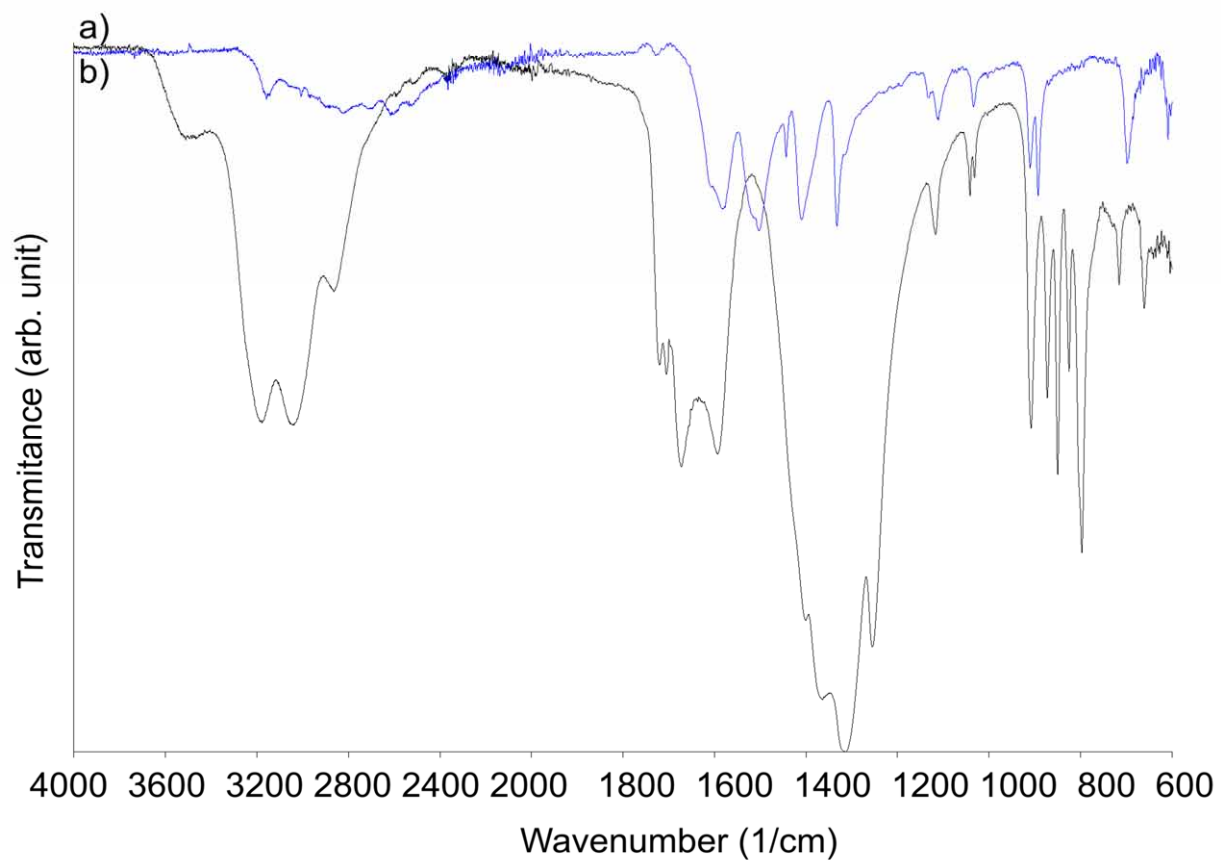

Fig. 6. Comparison of FT-IR spectra of (a) free glycine (blue profile) with (b) Nb(V)-peroxo-glycine complex (black profile).

### 3.) IR spectrum of annealed final powders

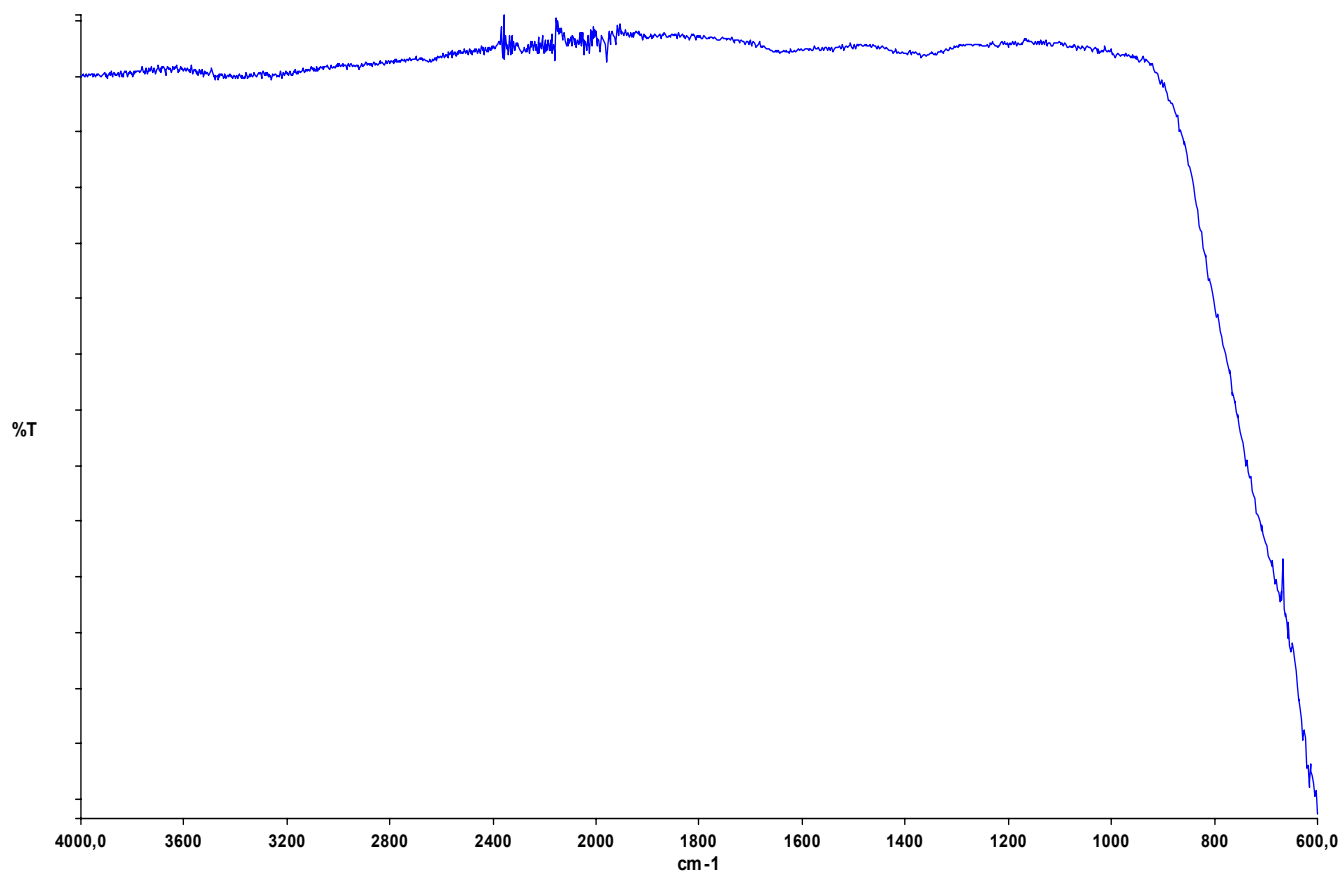

Fig. 7. FT-IR spectrum of  $K_{0.5}Na_{0.5}NbO_3$  nanopowders obtained with annealing of Nb(V)-peroxo-citrate or Nb(V)-peroxo-glycine prepared intermediates at  $T \geq 500$  °C for 2-4 hours.

Comment:

► FT-IR spectra of annealed powder samples showed no presence of organic residues (residual carbon) or any other impurities which should have absorption in mid-infrared 4000 – 600  $cm^{-1}$  area.



#### 4.) UV-Vis spectra of Nb(V)-peroxo-based precursors

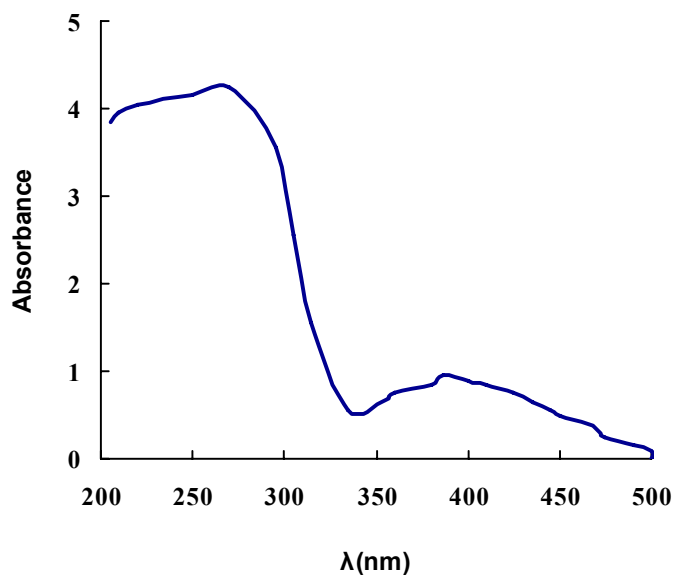

Fig. 8. UV-Vis spectrum of prepared Nb(V)-peroxo-citrato precursor in water<sup>[a]</sup>

<sup>[a]</sup> strong absorption ( $\sigma \rightarrow d\sigma^*$  LMCT) at 270 nm, weak absorption ( $\pi^* \rightarrow d\sigma^*$ ) at 387 nm, below 500 nm no absorption was detected.

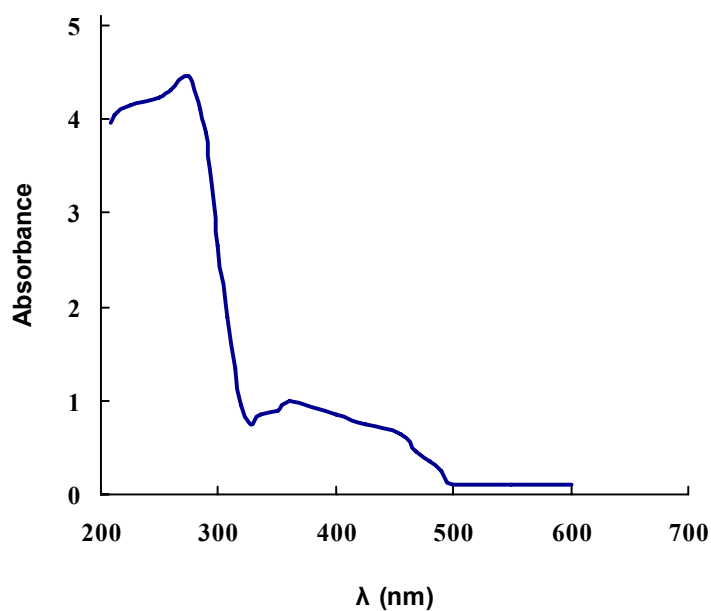

Fig. 9. UV-Vis spectrum of prepared Nb(V)-peroxo-glycine precursor in water<sup>[a]</sup>

<sup>[a]</sup> strong absorption ( $\sigma \rightarrow d\sigma^*$  LMCT) at 275 nm, weak absorption ( $\pi^* \rightarrow d\sigma^*$ ) at 360 nm, below 500 nm no absorption was detected.
